# Supplementary material for: Investigating the Interaction of Nanodiamonds with Human Serum Albumin and Induced Cytotoxicity
Source: Hindawi journal article supplement (doi:10.1155/2019/4503137), 2019-09-19
Supplement: f1 [file 4503137.f1.doc]

Electronic Supplementary Information

**Investigating the interaction of nanodiamonds with human serum albumin and induced cytotoxicity**

Miaomiao Chen a,b, Xiaoshuang Zuo a, Qinqin Xu a, Rong Wang b, Suhua Fan a, Hai Wu a,b*

a School of Chemistry and Materials Engineering, Fuyang Normal University, Fuyang, Anhui 236037, PR China.

b Anhui Province Key Laboratory of Environmental Hormone and Reproduction, Anhui Provincial Key Laboratory for Degradation and Monitoring of Pollution of the Environment, Fuyang Normal University, Fuyang, Anhui 236037, PR China.

* Corresponding authors. Tel.: +86 558 2596249; Fax: +86 558 2596249.

*E-mail addresses*: [wuhai317@126.com](mailto:ceszxy@mail.sysu.edu.cn)

**Determination for the amount of HSA on NDs surface**

Firstly, 0.2 mM HSA standard solution was prepared with high pure water. The HSA standard was diluted to 0.4, 0.8, 1.6, 2.4, 3.2, 4.0, 4.8, and 5.6 M. Then, 3.0 mL diluted HSA standard solutions in a 1.0 cm quartz cuvette were used to determine the fluorescence spectra on a RF-5301PC spectrophotometer (Shimadzu, Japan). The emission spectra were recorded between 300 and 450 nm at the excitation wavelength of 295 nm (Fig. S1A, the slit width is 5/5 nm). The calibration curve between fluorescence intensity and the concentration of HSA was shown in Fig. S1B.

The fluorescence intensity of HSA was first determined before the addition of NDs and the concentration of HAS could be calculated with the calibration curve. After being added NDs to HSA solution and shaken for 2h, the HSA-NDs solution was centrifuged at 12000 rpm and 4 C for 1 h. The precipitation of HSA-NDs was then washed two times with high purity water and was further centrifuged to remove unbound protein molecules. The supernatant and washing solution was merged and diluted to 50 mL volume, which was used to determine the fluorescence intensity. Then the amount of the unbound protein was calculated. Therefore, the amount of HSA adsorbed onto NDs was calculated from the difference of HSA concentration and the concentration of the supernatant and washing solution. (Supporting Information)

**
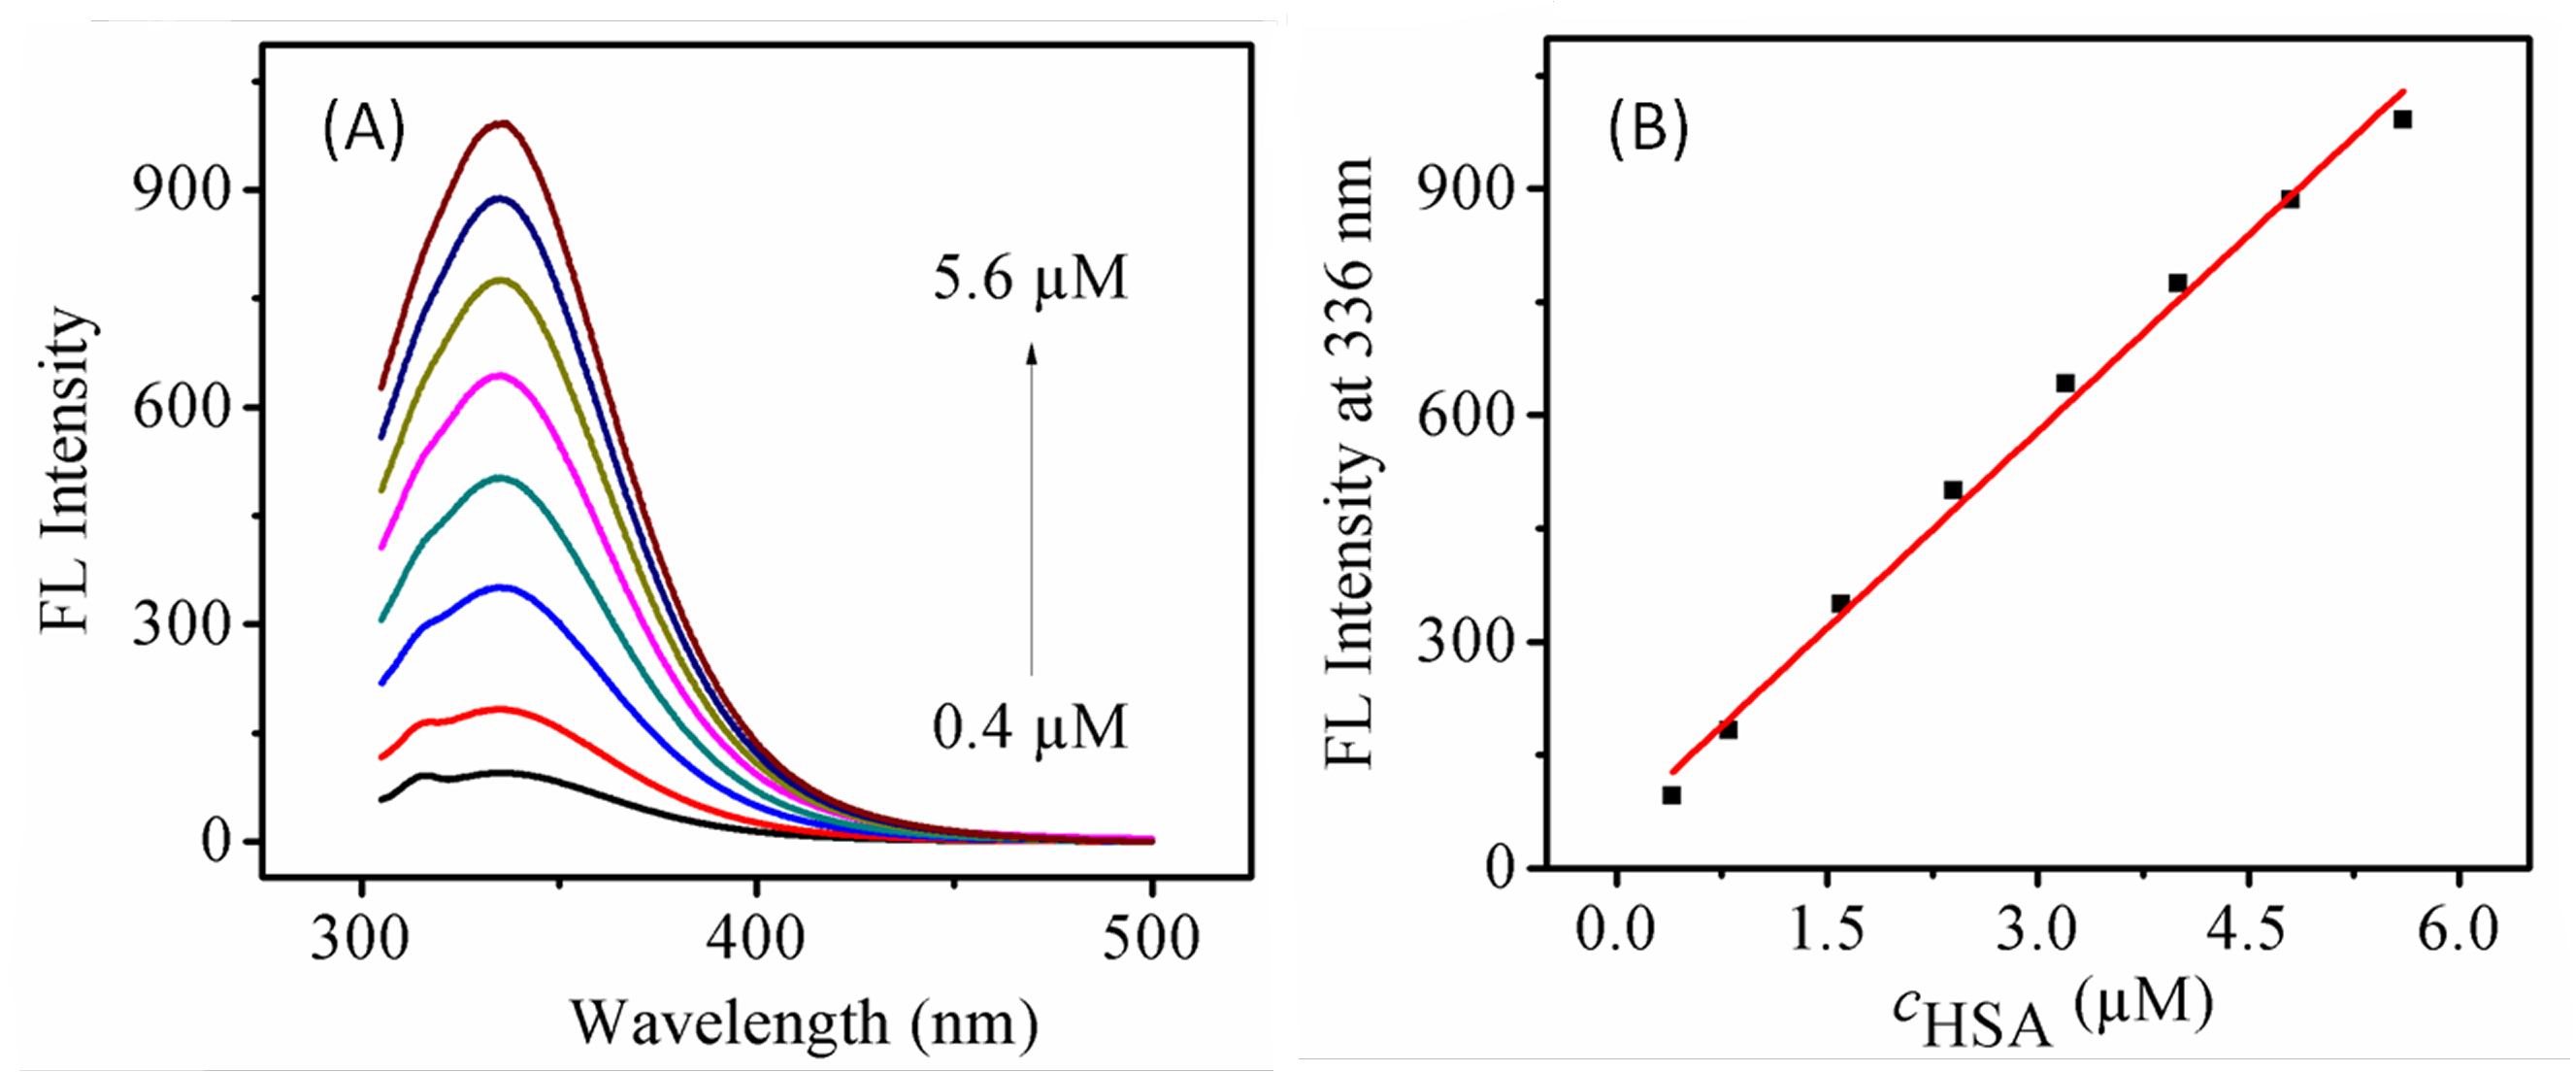
**

**Figure S1** **(A)** The fluorescence spectra ofHSA in 0.01 M PBS with various concentration (curves from bottom to top: 0.4, 0.8, 1.6, 2.4, 3.2, 4.0, 4.8, 5.6 M) at different temperature (T= 298 K, **ex=285 nm); (B) The calibration curve between fluorescence intensity and HSA concentration.

**
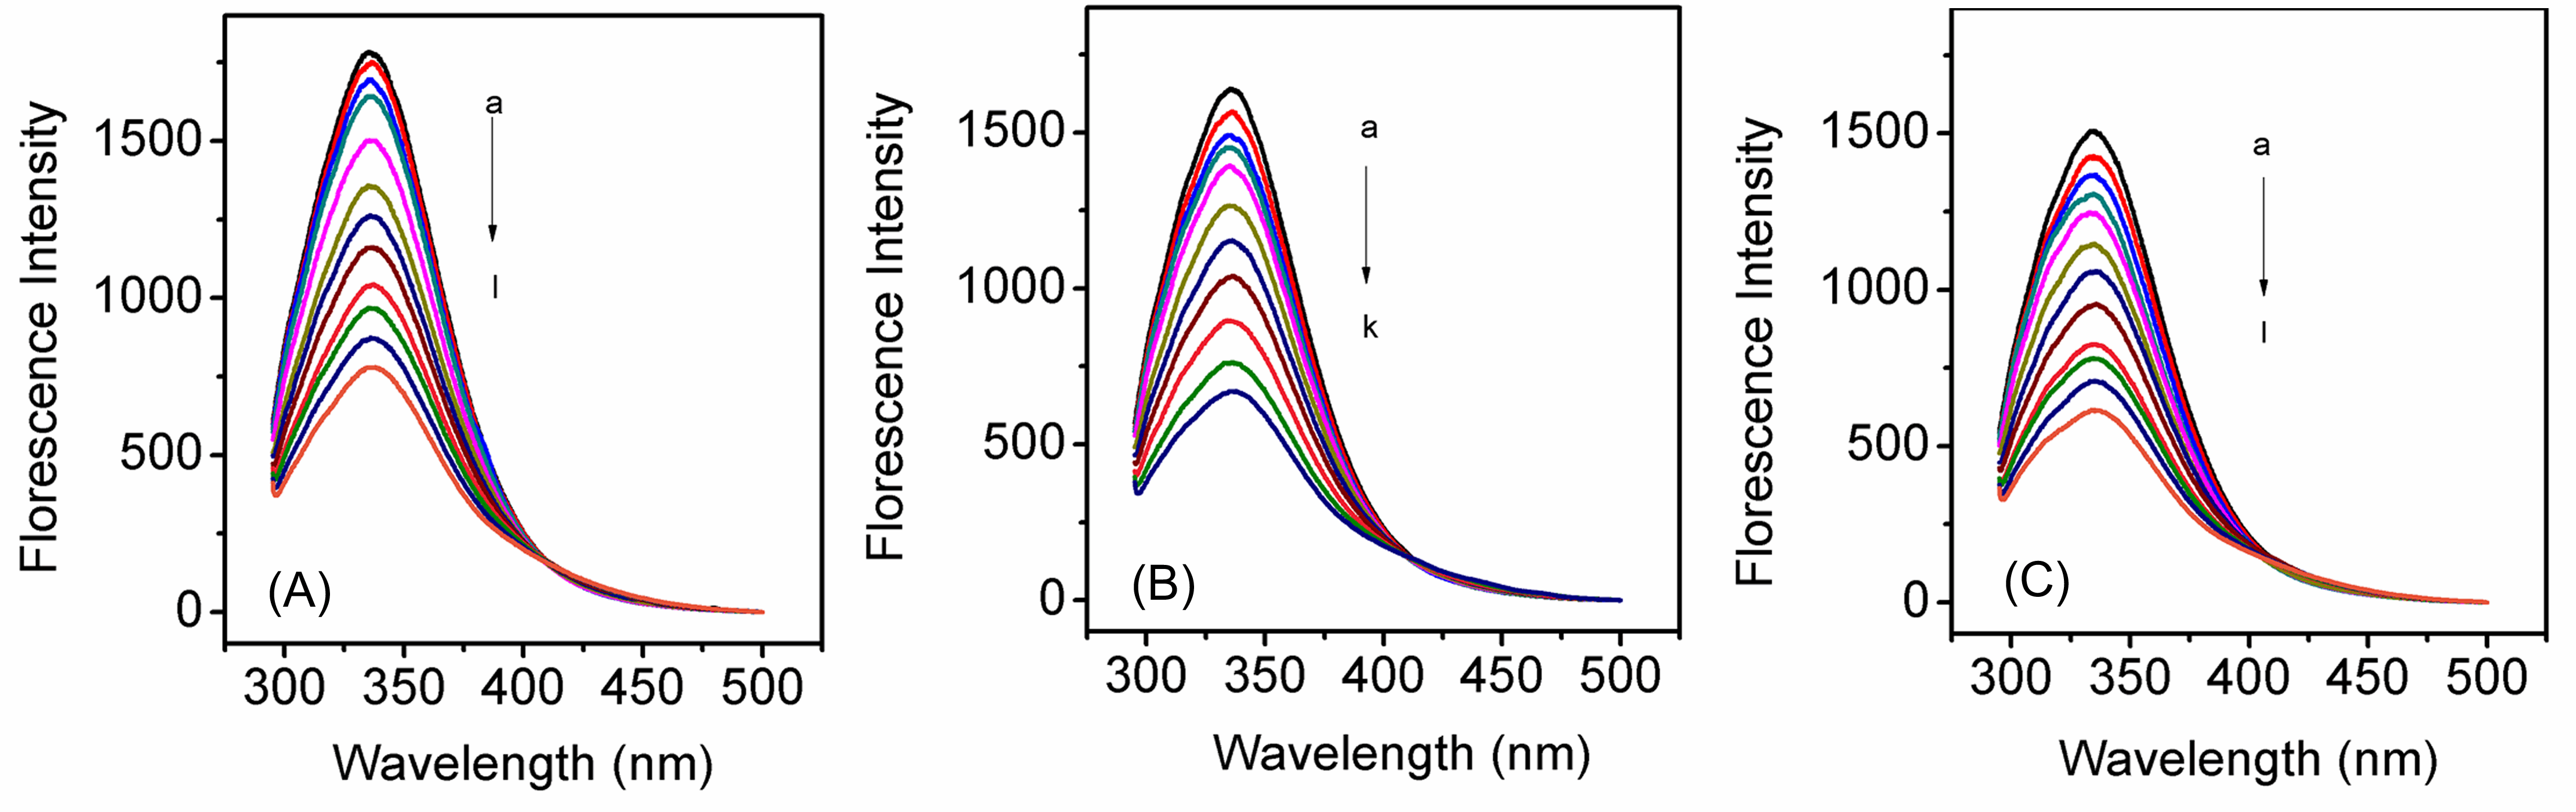
**

**Figure S2** Fluorescence quenching of 6.0 mM HSA observedwith increasing NDs concentrations in 0.01 M PBS at 288 K (A), 303 K (B), and 313 K (C) (pH 7.4, **ex=285 nm, *c*NDs from a to l are 0, 1.0, 2.0, 4.0, 8.0, 16.0, 24.0, 32.0, 40.0, 48.0, 56.0, and 64.0 mg L1).
